# Supplementary material
Source: PubMed Central journal article supplement (PMC7746597)
Supplement: NIHMS1602688-supplement-1.pdf [file NIHMS1602688-supplement-1.pdf]

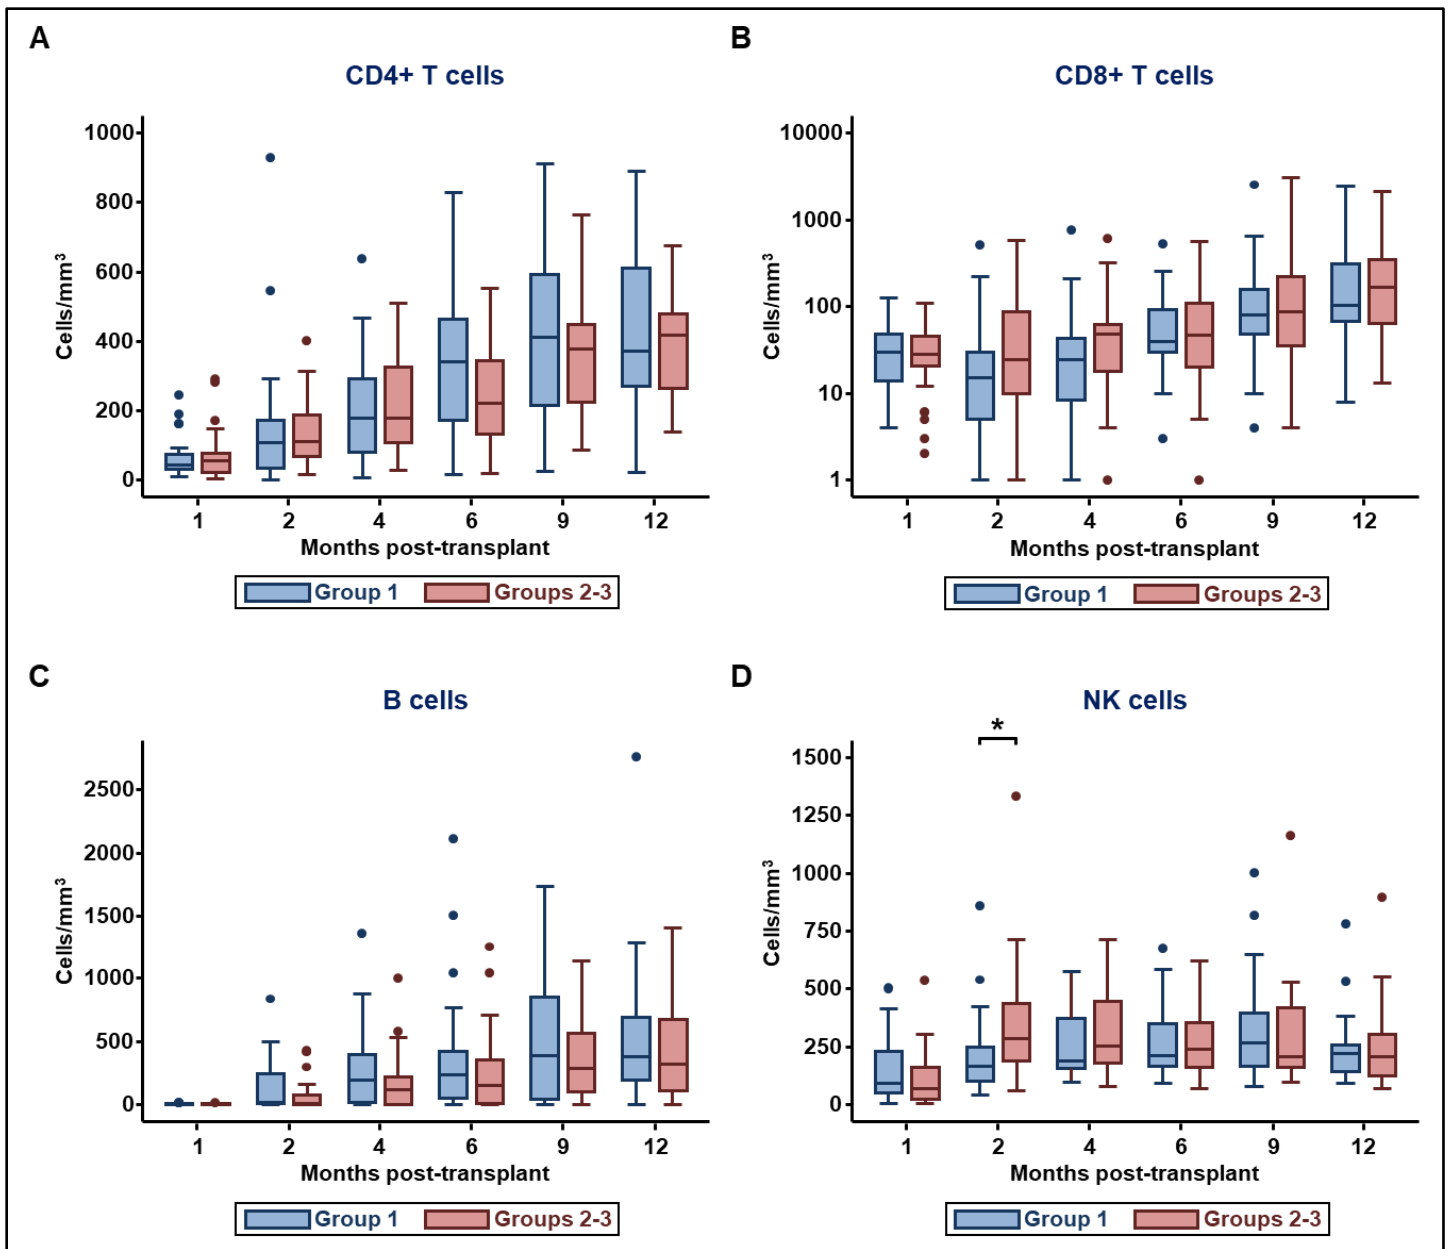

**Supplemental Figure 1. Lymphocyte subset recovery in engrafted haplo-dCBT recipients (n = 75).** Comparison of CD4+ T-cell (A), CD8+ T-cell (B), B-cell (C), and NK-cell (D) count recovery between haplo-dCBT recipients with optimal haplo-identical donor-derived myeloid bridge (Group 1 patients, Blue) and haplo-dCBT recipients with either transient or no myeloid bridge (Group 2-3 patients, Red). Optimal myeloid bridging was not associated with improved lymphocyte subset recovery. (\*  $p < 0.01$ )
